# Supplementary material for: The Change of Screen Time and Screen Addiction, and their Association with Psychological Well-being During the COVID-19 Pandemic: An Analysis of US Country-Wide School-Age Children and Adolescents Between 2018 and 2020
Source: bioRxiv or medRxiv preprint supplement (doi:10.1101/2023.03.20.23287490), 2023-03-21
Supplement: Supplementary file [file media-1.pdf]

## Supplementary Materials

| NSCH survey variable (variable name according to the public use data file) and detailed description of the question and answer choices on the original survey                                                                                                                                                                                                                                    | Recoded variable used in this study                                                                                                                                                                                                     |
|--------------------------------------------------------------------------------------------------------------------------------------------------------------------------------------------------------------------------------------------------------------------------------------------------------------------------------------------------------------------------------------------------|-----------------------------------------------------------------------------------------------------------------------------------------------------------------------------------------------------------------------------------------|
| <b>Recreational screen time (SCREENTIME).</b><br>"On most week days, about how much time did this child spend in front of a TV, computer, cellphone or other electronic device watching programs, playing games, accessing the internet or using social media, not including school work?"<br>Answer choices: 1 = Less than 1 hour, 2 = 1 hour, 3 = 2 hours, 4 = 3 hours or 5 = 4 or more hours. | <b>Screen Time</b><br>0.5 = SCREENTIME of 1 (i.e. Less than 1 hour),<br>1 = SCREENTIME of 2 (i.e. 1 hour),<br>2 = SCREENTIME of 3 (i.e. 2 hours),<br>3 = SCREENTIME of 4 (i.e. 3 hours),<br>4 = SCREENTIME of 5 (i.e. 4 or more hours). |
| <b>Ability to remain calm and in control when challenged (K7Q85_R).</b><br>"How often: Does this child stay calm and in control when faced with a challenge?"<br>Answer choices: 1 = Always, 2 = Usually, 3 = Sometimes, 4 = Never.                                                                                                                                                              | <b>Not Calm</b><br>1 = K7Q85_R value of 3 or 4, indicating the child does not stay calm or in control,<br>0 = K7Q85_R value of 1 or 2, indicating the child does stay calm or in control.                                               |
| <b>Children who argue too much (K7Q70_R).</b><br>"How often: Does this child argue too much?"<br>Answer choices: 1 = Always, 2 = Usually, 3 = Sometimes, 4 = Never.                                                                                                                                                                                                                              | <b>Argues Too Much</b><br>1 = K7Q70_R1 value of 1 or 2, indicating the child argues too much,<br>0 = K7Q70_R1 value of 3 or 4, indicating the child does not argue too much.                                                            |
| <b>Difficulty making or keeping friends (MAKEFRIEND).</b><br>"Compared to other children his or her age, how much difficulty does this child have making or keeping friends?"<br>Answer choices: 3 = A lot of difficulty, 2 = A little difficulty, 1 = No difficulty.                                                                                                                            | <b>Difficult to Make Friends</b><br>1 = MAKEFRIEND of 2 or 3, indicating the child has difficulty making or keeping friends,<br>0 = MAKEFRIEND of 1, indicating the child does not have difficulty making or keeping friends.           |
| <b>Children who work to finish the tasks they start (K7Q84_R).</b><br>"How often: Does this child work to finish tasks they start?"<br>Answer choices: 1 = Always, 2 = Usually, 3 = Sometimes, 4 = Never.                                                                                                                                                                                        | <b>Does Not Finish Tasks</b><br>1 = K7Q84_R value of 3 or 4, indicating the child does not finish tasks,<br>0 = K7Q84_R value of 1 or 2, indicating the child does finish tasks.                                                        |
| <b>Children who show interest and curiosity in learning new things (K6Q71_R).</b><br>"How often: Does this child show interest and curiosity in learning new things?"<br>Answers choices: 1 = Always, 2 = Usually, 3 = Sometimes, 4 = Never.                                                                                                                                                     | <b>Not Curious</b><br>1 = K6Q71_R value of 3 or 4, indicating the child does not show interest or curiosity,<br>0 = K6Q71_R value of 1 or 2, indicating the child does show interest and curiosity.                                     |
| <b>Parent felt a child is difficulty to care for (K8Q31).</b><br>"During the past month, how often have you felt: that this child is much harder to care for than most children his or her age?"<br>Answers choices: 1 = Never, 2 = Rarely, 3 = Sometimes, 4 = Usually, 5 = Always.                                                                                                              | <b>Difficult to Care</b><br>1 = K8Q31 value of 3, 4 or 5, indicating the child is difficult to care for,<br>0 = K8Q31 value of 1 or 2, indicating the child is not difficult to care for.                                               |
| <b>Been diagnosed with depression (K2Q32A)</b><br>"Has a doctor or other health care provider EVER told you that this child has depression?" Answers choices: 1 = Yes, 2 = No.                                                                                                                                                                                                                   | <b>Depression</b><br>1 = K2Q32A value of 1, indicating a doctor or other health care provider has diagnosed that the child has depression,<br>0 = K2Q32A value of 2, indicating the child has not been diagnosed with depression.       |
| <b>Been diagnosed with anxiety (K2Q33A)</b><br>"Has a doctor or other health care provider EVER told you that this child has anxiety?" Answers choices: 1 = Yes, 2 = No.                                                                                                                                                                                                                         | <b>Anxiety</b><br>1 = K2Q33A value of 1, indicating the child ever had anxiety,<br>0 = K2Q33A value of 2, indicating the child has never had anxiety.                                                                                   |

**Table S1: Description of the survey questions and answer choices from the NSCH, and recoded variables used for the analyses in our study.**

| Well-being Issue (WBI) Score | Values | Definition                                                                                                                                                                                                                  |
|------------------------------|--------|-----------------------------------------------------------------------------------------------------------------------------------------------------------------------------------------------------------------------------|
| WBI1                         | 0 - 6  | Sum of six WBI symptom dichotomous variables excluding depression and anxiety ( <i>Not Calm, Argues Too Much, Difficult to Make Friends, Does Not Finish Tasks, Not Curious, and Difficult to Care</i> )                    |
| WBI2                         | 1 or 0 | 1 = has at least one of the eight WBI symptoms ( <i>Not Calm, Argues Too Much, Difficult to Make Friends, Does Not Finish Tasks, Not Curious, Difficult to Care, Depression, or Anxiety</i> ), or<br>0=none of the symptoms |

**Table S2: Description of the construction of the well-being scores, WBI1 and WBI2.**

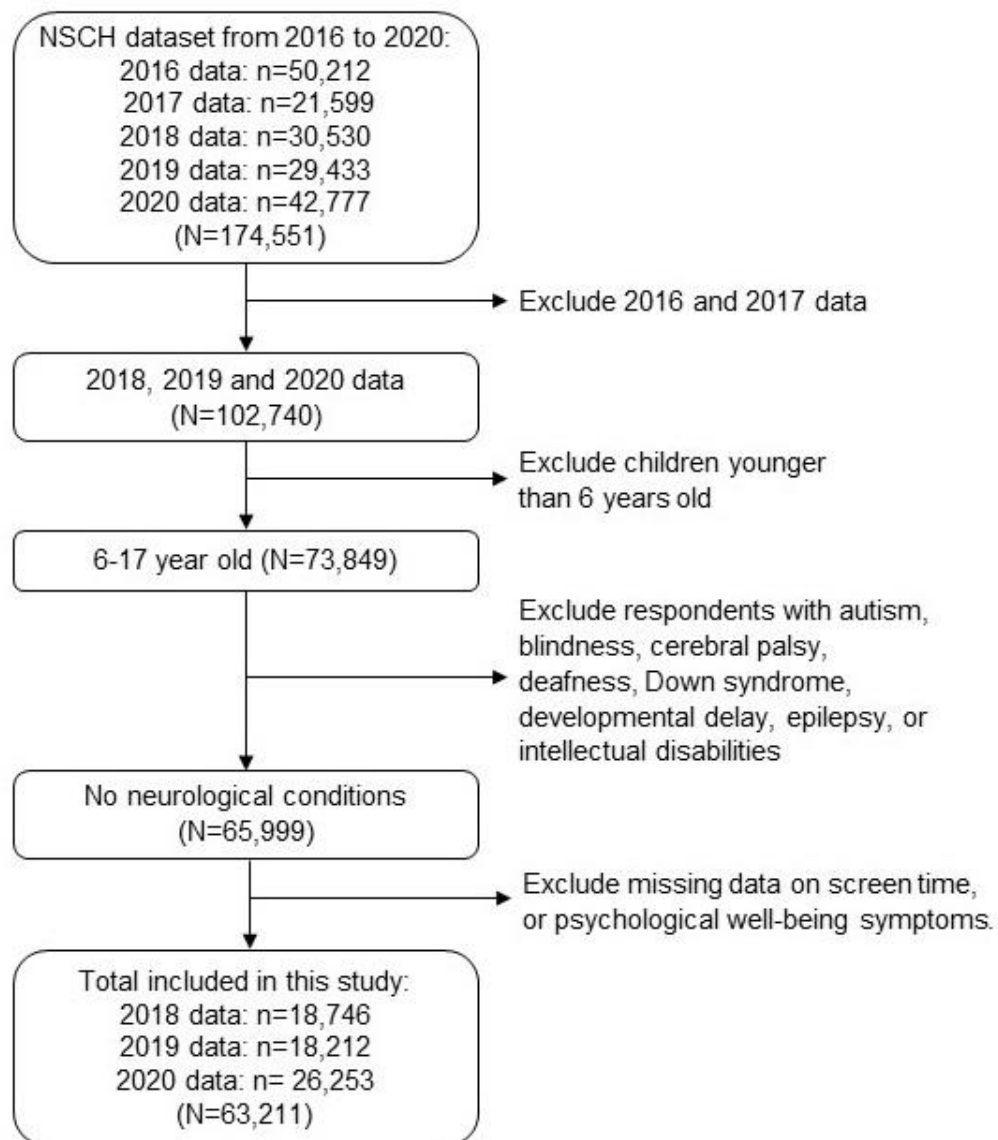

**Figure S1: Flowchart of study inclusion criteria.**

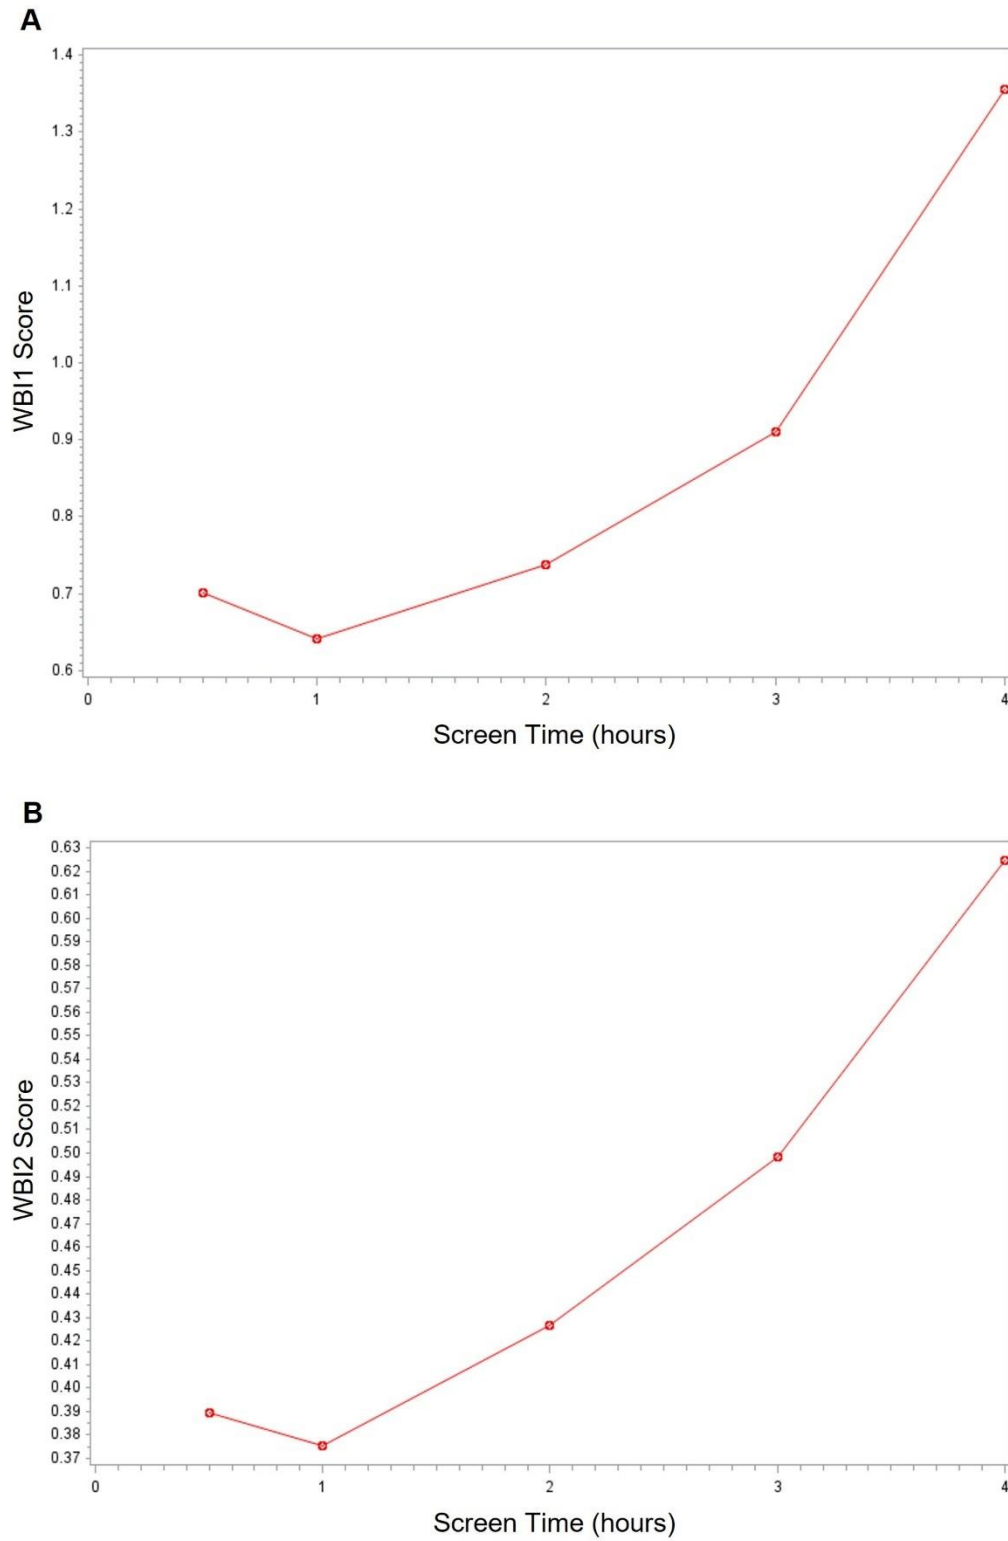

**Figure S2: Assessment of recreational screen time (x-axis) by the psychological average well-being scores (y-axis) for (A) WBI1 and (B) WBI2**
